# Supplementary material for: Mitigating site effects in covariance for machine learning in neuroimaging data
Source: PubMed Central journal article supplement (PMC8837590; doi:10.1002/hbm.25688), 2021-12-14
Supplement: HBM-43-1179-s001.pdf [file HBM-43-1179-s001.pdf]

1 Mitigating Site Effects in Covariance for Machine  
2 Learning in Neuroimaging Data

3 Andrew A. Chen<sup>a,b,\*</sup>, Joanne C. Beer<sup>a</sup>, Nicholas J. Tustison<sup>c</sup>, Philip A.  
4 Cook<sup>d</sup>, Russell T. Shinohara<sup>a,b,1</sup>, Haochang Shou<sup>a,b,1</sup>, and the Alzheimer's  
5 Disease Neuroimaging Initiative<sup>e</sup>

6 <sup>a</sup>Penn Statistics in Imaging and Visualization Center, Department of  
7 Biostatistics, Epidemiology, and Informatics, University of Pennsylvania,  
8 Philadelphia, PA 19104

9 <sup>b</sup>Center for Biomedical Image Computing and Analytics, University of  
10 Pennsylvania, Philadelphia, PA 19104

11 <sup>c</sup>Department of Radiology and Medical Imaging, University of Virginia,  
12 Irvine, Charlottesville, VA 22903

13 <sup>d</sup>Department of Radiology, University of Pennsylvania, Philadelphia, PA  
14 19104

15 <sup>e</sup>Data used in preparation of this article were obtained from the Alzheimer's  
16 Disease Neuroimaging Initiative (ADNI) database ([adni.loni.usc.edu](http://adni.loni.usc.edu)). As  
17 such, the investigators within the ADNI contributed to the design and  
18 implementation of ADNI and/or provided data but did not participate in  
19 analysis or writing of this report. A complete listing of ADNI investigators  
20 can be found at: [http://adni.loni.usc.edu/wp-content/uploads/how\\_to\\_app  
21 ly/ADNI\\_Acknowledgement\\_List.pdf](http://adni.loni.usc.edu/wp-content/uploads/how_to_apply/ADNI_Acknowledgement_List.pdf)

22 <sup>1</sup>Equal contribution

23 **\*Correspondence: Andrew A. Chen**

24 [andrewac@pennmedicine.upenn.edu](mailto:andrewac@pennmedicine.upenn.edu)

## Site A (Siemens)

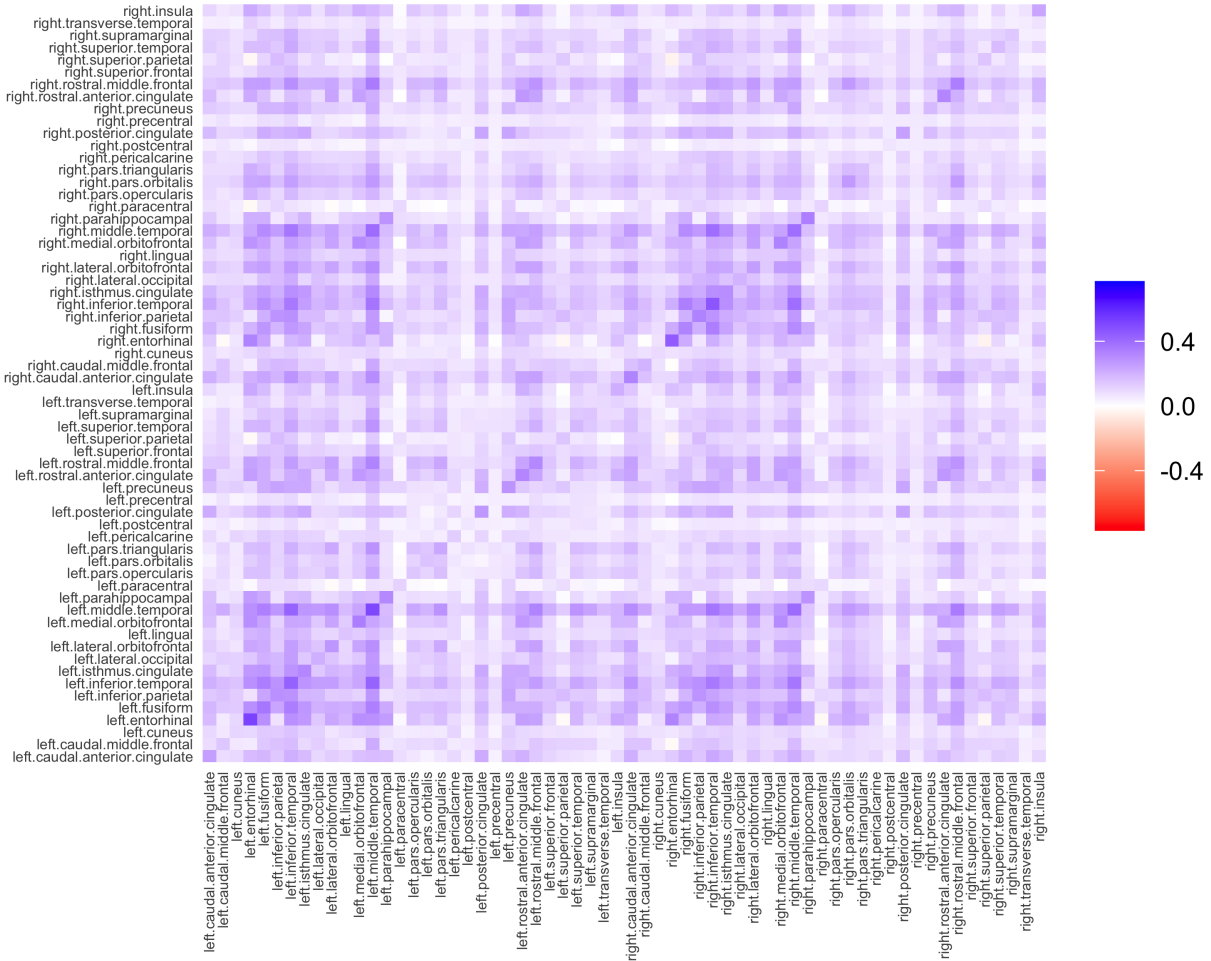

Supplementary Figure 1: **Covariance matrix for cortical thickness values acquired at the largest site.** Site A is a Siemens Symphony 1.5T scanner. Regions of interest are labelled on the x-axis and y-axis.

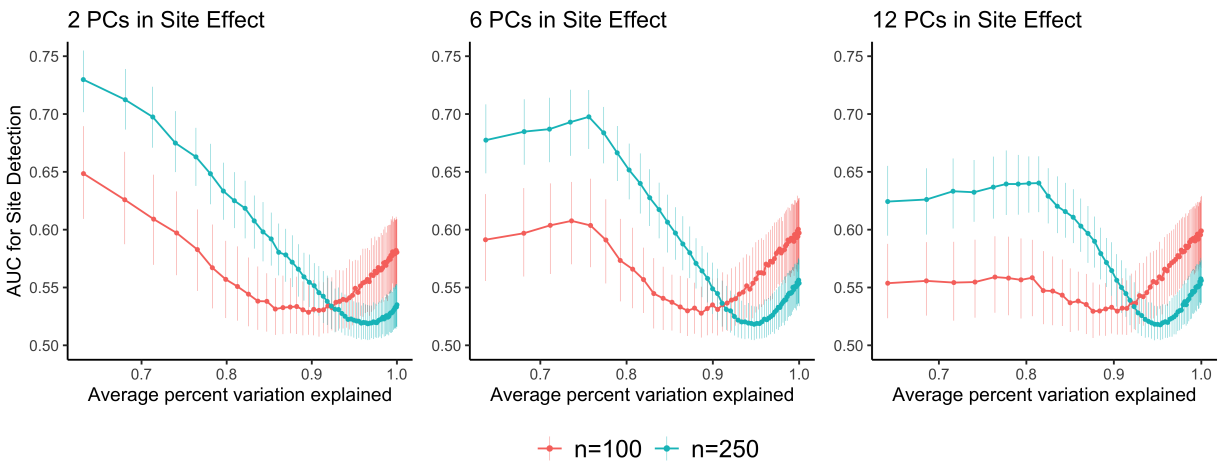

Supplementary Figure 2: **Simple Covariance Effect simulation AUCs for detection of site after applying CovBat including varying numbers of principal components.** Each point represents the median and interquartile range of AUCs for detection of site across 1000 simulations. The rank of the site covariance effect varies in each plot and the number of features is fixed at 62. Results are displayed for both 100 and 250 samples as separate lines.

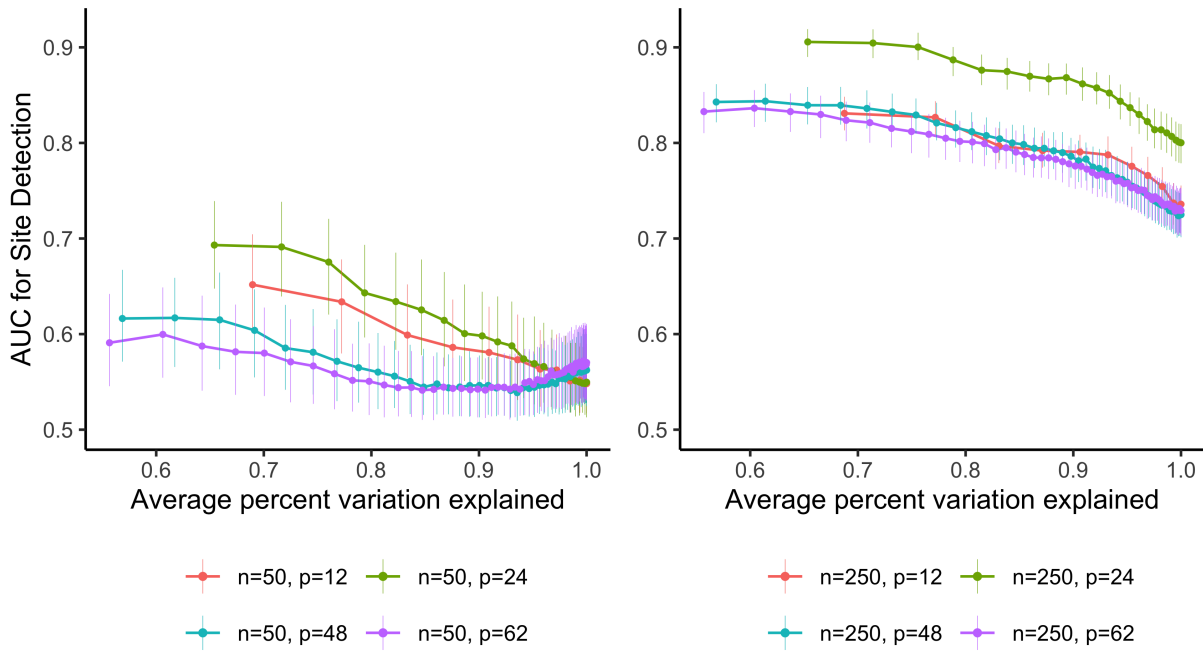

Supplementary Figure 3: **Diagnosis Affects Covariance simulation AUCs for detection of site after applying CovBat including varying numbers of principal components.** Each point represents the median and interquartile range of AUCs for detection of site across 1000 simulations. Differing sample sizes and numbers of features are represented by different lines in each plots.

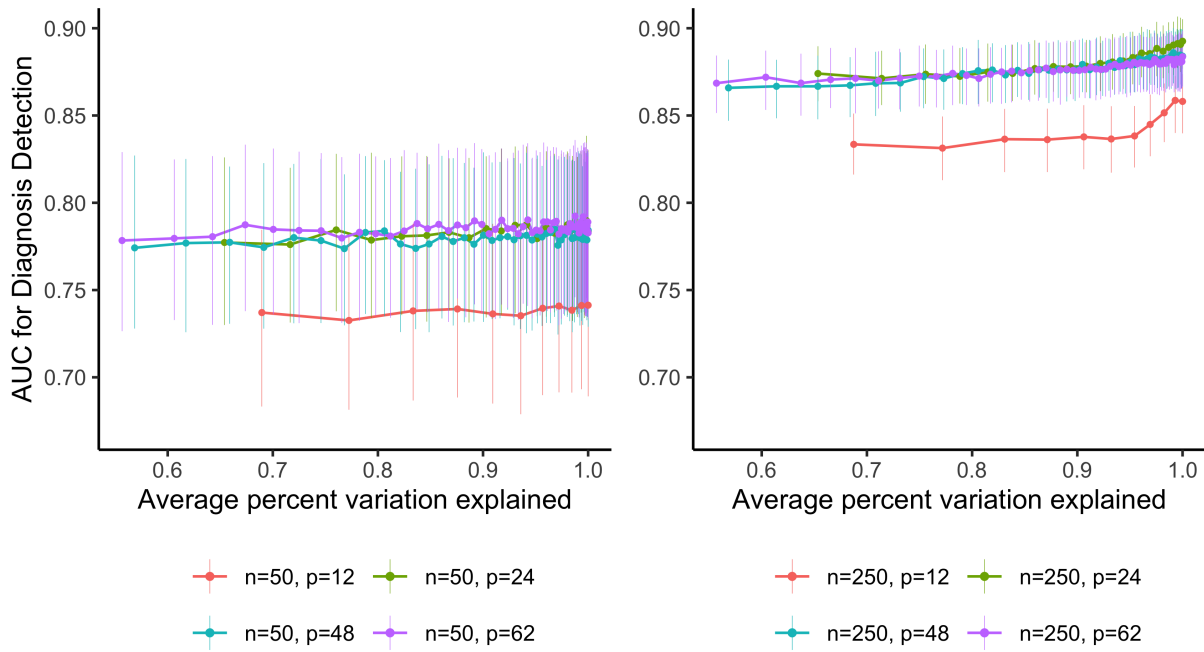

Supplementary Figure 4: **Diagnosis Affects Covariance simulation AUCs for detection of simulated diagnosis after applying CovBat including varying numbers of principal components.** Each point represents the median and interquartile range of AUCs for detection of diagnosis across 1000 simulations. Differing sample sizes and numbers of features are represented by different lines in each plots.

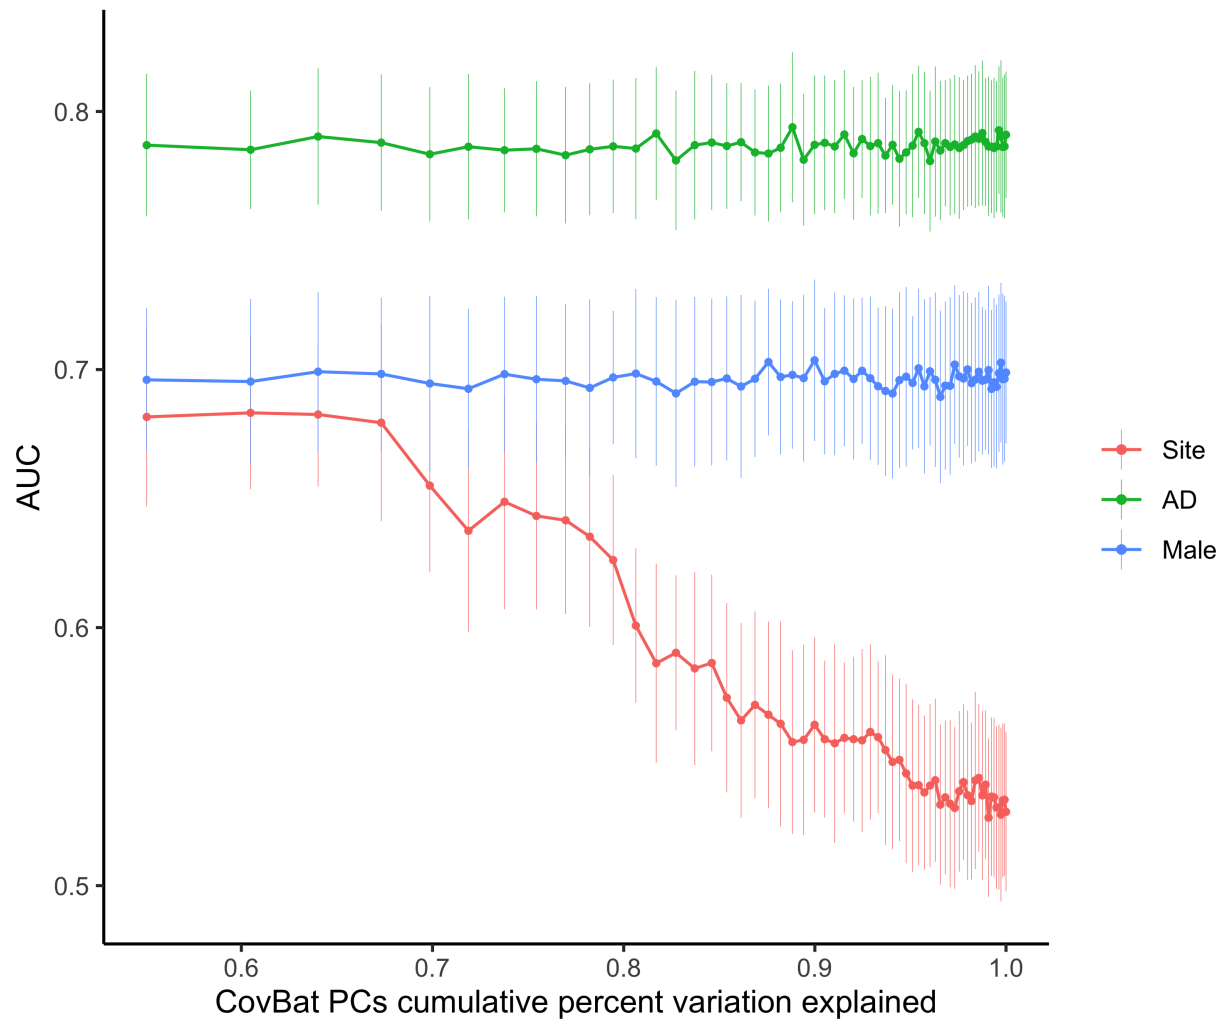

Supplementary Figure 5: **AUC for machine learning detection after CovBat across varying numbers of PCs included in the model.** For each number of PCs, the median and IQR for detection of either Siemens, male, or Alzheimer’s disease are displayed. Each point represents 1000 splits of the ADNI data into 50% training and 50% validation.

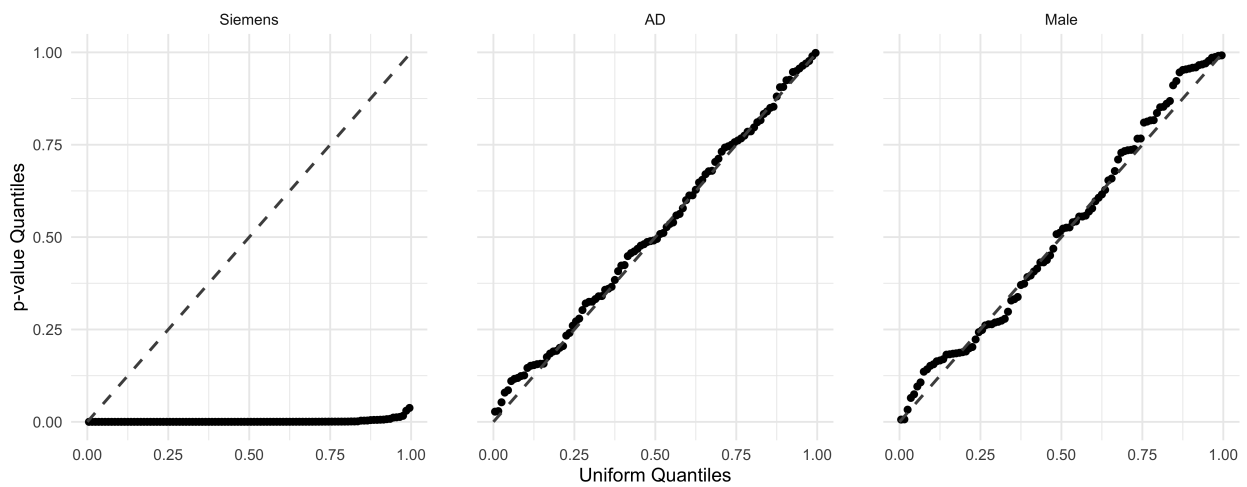

Supplementary Figure 6: **DeLong’s test  $p$ -value Q-Q plots for comparing AUC between ComBat and CovBat.** For each of the 100 train-test splits within each MVPA experiment, DeLong’s test is performed with the two-sided null hypothesis that the AUC is different in ComBat-adjusted and CovBat-adjusted data. The  $p$ -values for each experiment are compared to a uniform distribution from 0 to 1.

|       |     | ComBat Simulation |                  |                  | Diagnosis affects Mean |                  |                  |                  |
|-------|-----|-------------------|------------------|------------------|------------------------|------------------|------------------|------------------|
| $n_i$ | $p$ | Unharmonized      | ComBat           | CovBat           | Unharmonized           | ComBat           | CovBat           |                  |
| 8     | 25  | 0.61 (0.54-0.67)  | 0.58 (0.53-0.63) | 0.62 (0.56-0.67) | 0.69 (0.63-0.76)       | 0.58 (0.53-0.63) | 0.57 (0.52-0.62) |                  |
|       | 24  | 0.64 (0.57-0.71)  | 0.58 (0.53-0.63) | 0.64 (0.58-0.69) | 0.74 (0.68-0.80)       | 0.58 (0.53-0.65) | 0.56 (0.52-0.61) |                  |
|       | 48  | 0.67 (0.60-0.74)  | 0.58 (0.53-0.63) | 0.66 (0.61-0.71) | 0.72 (0.65-0.78)       | 0.56 (0.52-0.61) | 0.62 (0.57-0.68) |                  |
|       | 62  | 0.68 (0.61-0.75)  | 0.58 (0.53-0.63) | 0.66 (0.61-0.72) | 0.72 (0.65-0.79)       | 0.56 (0.52-0.61) | 0.64 (0.58-0.70) |                  |
|       | 50  | 0.64 (0.58-0.70)  | 0.55 (0.52-0.59) | 0.58 (0.53-0.62) | 0.79 (0.74-0.83)       | 0.68 (0.62-0.73) | 0.59 (0.55-0.64) |                  |
|       | 24  | 0.69 (0.64-0.75)  | 0.55 (0.52-0.59) | 0.59 (0.54-0.63) | 0.84 (0.80-0.88)       | 0.72 (0.67-0.78) | 0.59 (0.55-0.64) |                  |
|       | 48  | 0.72 (0.67-0.78)  | 0.55 (0.52-0.59) | 0.61 (0.57-0.65) | 0.82 (0.77-0.86)       | 0.61 (0.56-0.67) | 0.54 (0.51-0.57) |                  |
|       | 62  | 0.74 (0.69-0.79)  | 0.55 (0.52-0.59) | 0.61 (0.57-0.65) | 0.81 (0.77-0.86)       | 0.58 (0.54-0.63) | 0.55 (0.51-0.58) |                  |
|       | 100 | 12                | 0.67 (0.63-0.72) | 0.54 (0.51-0.56) | 0.55 (0.52-0.58)       | 0.86 (0.83-0.89) | 0.78 (0.75-0.82) | 0.71 (0.68-0.75) |
|       | 24  | 0.74 (0.70-0.78)  | 0.54 (0.51-0.56) | 0.56 (0.53-0.59) | 0.92 (0.90-0.94)       | 0.85 (0.82-0.88) | 0.74 (0.71-0.78) |                  |
|       | 48  | 0.79 (0.75-0.83)  | 0.54 (0.51-0.57) | 0.57 (0.54-0.60) | 0.90 (0.87-0.93)       | 0.75 (0.71-0.78) | 0.62 (0.58-0.66) |                  |
|       | 62  | 0.82 (0.78-0.85)  | 0.54 (0.51-0.57) | 0.57 (0.54-0.60) | 0.90 (0.87-0.93)       | 0.71 (0.67-0.76) | 0.60 (0.57-0.64) |                  |
|       | 250 | 12                | 0.72 (0.67-0.75) | 0.52 (0.51-0.54) | 0.53 (0.51-0.55)       | 0.92 (0.91-0.94) | 0.88 (0.87-0.90) | 0.84 (0.83-0.86) |
|       | 24  | 0.80 (0.77-0.84)  | 0.52 (0.51-0.54) | 0.53 (0.51-0.55) | 0.97 (0.96-0.98)       | 0.95 (0.94-0.96) | 0.90 (0.88-0.92) |                  |
|       | 48  | 0.87 (0.84-0.89)  | 0.53 (0.51-0.55) | 0.54 (0.52-0.56) | 0.96 (0.95-0.97)       | 0.88 (0.87-0.90) | 0.79 (0.77-0.81) |                  |
|       | 62  | 0.89 (0.86-0.91)  | 0.53 (0.51-0.55) | 0.54 (0.52-0.56) | 0.97 (0.96-0.97)       | 0.87 (0.85-0.88) | 0.79 (0.76-0.81) |                  |

Supplementary Table 1: **AUC results from MVPA simulations for detection of site across multiple sample sizes (n) and number of features (p) in the absence of predictor effects on covariance.** For each of 1000 simulations, the data is randomly split into 50% training and 50% validation then a random forests algorithm is trained using the training set to predict either Site 1 or the presence of the binary predictor. The median AUC across these simulations are reported with lower and upper quartiles displayed in parentheses. Scenarios where CovBat outperforms ComBat are colored in blue.



| $n_i$ | $p$ | Diagnosis affects Covariance |                  |                         | Covariance Only         |                  |                         |                         |
|-------|-----|------------------------------|------------------|-------------------------|-------------------------|------------------|-------------------------|-------------------------|
|       |     | Unharmonized                 | ComBat           | CovBat                  | Unharmonized            | ComBat           | CovBat                  |                         |
| 25    | 12  | 0.70 (0.63-0.77)             | 0.58 (0.53-0.63) | <b>0.57 (0.53-0.62)</b> | 0.61 (0.56-0.68)        | 0.58 (0.53-0.63) | <b>0.57 (0.52-0.62)</b> |                         |
|       | 24  | 0.74 (0.67-0.81)             | 0.58 (0.53-0.65) | <b>0.57 (0.53-0.63)</b> | 0.64 (0.56-0.71)        | 0.57 (0.53-0.63) | 0.58 (0.54-0.63)        |                         |
|       | 48  | 0.74 (0.66-0.80)             | 0.57 (0.52-0.61) | 0.63 (0.57-0.69)        | 0.61 (0.55-0.67)        | 0.57 (0.52-0.62) | 0.64 (0.60-0.70)        |                         |
|       | 62  | 0.73 (0.66-0.79)             | 0.57 (0.53-0.62) | 0.65 (0.60-0.71)        | 0.60 (0.54-0.66)        | 0.57 (0.53-0.63) | 0.65 (0.60-0.71)        |                         |
|       | 50  | 12                           | 0.78 (0.74-0.83) | 0.67 (0.62-0.72)        | <b>0.56 (0.52-0.61)</b> | 0.70 (0.64-0.74) | 0.66 (0.61-0.71)        | <b>0.56 (0.52-0.60)</b> |
|       |     | 24                           | 0.84 (0.79-0.88) | 0.71 (0.65-0.77)        | <b>0.57 (0.53-0.61)</b> | 0.74 (0.69-0.79) | 0.70 (0.65-0.75)        | <b>0.56 (0.52-0.60)</b> |
|       |     | 48                           | 0.82 (0.77-0.86) | 0.62 (0.57-0.68)        | <b>0.55 (0.52-0.58)</b> | 0.67 (0.62-0.72) | 0.60 (0.55-0.65)        | <b>0.55 (0.51-0.59)</b> |
|       |     | 62                           | 0.82 (0.78-0.87) | 0.60 (0.55-0.65)        | <b>0.55 (0.52-0.59)</b> | 0.65 (0.60-0.70) | 0.57 (0.53-0.62)        | <b>0.56 (0.52-0.60)</b> |
|       | 100 | 12                           | 0.85 (0.82-0.88) | 0.77 (0.73-0.80)        | <b>0.66 (0.63-0.70)</b> | 0.78 (0.75-0.81) | 0.77 (0.73-0.80)        | <b>0.66 (0.62-0.69)</b> |
|       |     | 24                           | 0.91 (0.89-0.93) | 0.84 (0.81-0.86)        | <b>0.69 (0.66-0.73)</b> | 0.84 (0.81-0.87) | 0.83 (0.80-0.86)        | <b>0.69 (0.65-0.72)</b> |
|       |     | 48                           | 0.90 (0.87-0.93) | 0.75 (0.71-0.79)        | <b>0.60 (0.56-0.63)</b> | 0.77 (0.74-0.80) | 0.74 (0.70-0.78)        | <b>0.59 (0.55-0.62)</b> |
|       |     | 62                           | 0.90 (0.88-0.93) | 0.72 (0.68-0.76)        | <b>0.59 (0.56-0.62)</b> | 0.75 (0.71-0.78) | 0.71 (0.67-0.75)        | <b>0.58 (0.54-0.61)</b> |
| 250   | 12  | 0.90 (0.89-0.92)             | 0.85 (0.84-0.87) | <b>0.78 (0.76-0.80)</b> | 0.85 (0.84-0.87)        | 0.85 (0.84-0.87) | <b>0.77 (0.76-0.79)</b> |                         |
|       | 24  | 0.96 (0.95-0.97)             | 0.92 (0.91-0.93) | <b>0.83 (0.82-0.85)</b> | 0.92 (0.91-0.93)        | 0.92 (0.91-0.93) | <b>0.83 (0.81-0.85)</b> |                         |
|       | 48  | 0.96 (0.95-0.97)             | 0.87 (0.85-0.88) | <b>0.76 (0.73-0.78)</b> | 0.87 (0.85-0.89)        | 0.87 (0.85-0.88) | <b>0.75 (0.73-0.77)</b> |                         |
|       | 62  | 0.96 (0.95-0.97)             | 0.86 (0.84-0.87) | <b>0.76 (0.73-0.78)</b> | 0.86 (0.84-0.88)        | 0.85 (0.83-0.87) | <b>0.75 (0.73-0.78)</b> |                         |

Supplementary Table 2: **AUC results from MVPA simulations for detection of site across multiple sample sizes (n) and number of features (p) where the predictor has effects on covariance.** For each of 1000 simulations, the data is randomly split into 50% training and 50% validation then a random forests algorithm is trained using the training set to predict either Site 1 or the presence of the binary predictor. The median AUC across these simulations are reported with lower and upper quartiles displayed in parentheses. Scenarios where CovBat outperforms ComBat are colored in blue.

|     |     | Diagnosis Affects Covariance |                  |                  | Covariance Only  |                  |                  |                  |
|-----|-----|------------------------------|------------------|------------------|------------------|------------------|------------------|------------------|
| n   | p   | Unharmonized                 | ComBat           | CovBat           | Unharmonized     | ComBat           | CovBat           |                  |
| 25  | 12  | 0.68 (0.60-0.75)             | 0.69 (0.61-0.76) | 0.69 (0.61-0.76) | 0.68 (0.61-0.75) | 0.69 (0.61-0.76) | 0.69 (0.61-0.77) |                  |
|     | 24  | 0.71 (0.63-0.78)             | 0.72 (0.65-0.79) | 0.73 (0.66-0.80) | 0.72 (0.64-0.78) | 0.73 (0.66-0.80) | 0.73 (0.65-0.80) |                  |
|     | 48  | 0.71 (0.64-0.78)             | 0.72 (0.65-0.79) | 0.74 (0.66-0.80) | 0.72 (0.65-0.79) | 0.72 (0.65-0.79) | 0.73 (0.66-0.80) |                  |
|     | 62  | 0.72 (0.65-0.79)             | 0.73 (0.65-0.80) | 0.74 (0.66-0.81) | 0.72 (0.65-0.79) | 0.73 (0.66-0.80) | 0.74 (0.67-0.81) |                  |
|     | 50  | 12                           | 0.73 (0.67-0.77) | 0.73 (0.68-0.77) | 0.74 (0.69-0.78) | 0.73 (0.68-0.78) | 0.73 (0.68-0.78) | 0.74 (0.69-0.79) |
|     |     | 24                           | 0.77 (0.72-0.81) | 0.78 (0.72-0.82) | 0.78 (0.73-0.83) | 0.77 (0.72-0.82) | 0.77 (0.73-0.82) | 0.79 (0.73-0.83) |
|     |     | 48                           | 0.76 (0.72-0.81) | 0.77 (0.72-0.82) | 0.78 (0.73-0.83) | 0.77 (0.72-0.81) | 0.77 (0.73-0.82) | 0.78 (0.73-0.83) |
|     |     | 62                           | 0.77 (0.72-0.82) | 0.78 (0.73-0.83) | 0.79 (0.73-0.83) | 0.77 (0.72-0.82) | 0.78 (0.73-0.82) | 0.78 (0.73-0.83) |
|     | 100 | 12                           | 0.77 (0.74-0.80) | 0.78 (0.74-0.81) | 0.79 (0.75-0.82) | 0.78 (0.75-0.81) | 0.78 (0.74-0.81) | 0.79 (0.75-0.82) |
|     |     | 24                           | 0.82 (0.78-0.85) | 0.82 (0.79-0.85) | 0.84 (0.81-0.87) | 0.82 (0.79-0.85) | 0.82 (0.79-0.85) | 0.84 (0.81-0.87) |
|     |     | 48                           | 0.81 (0.78-0.84) | 0.82 (0.79-0.85) | 0.83 (0.80-0.86) | 0.81 (0.78-0.84) | 0.81 (0.78-0.84) | 0.83 (0.80-0.86) |
|     |     | 62                           | 0.82 (0.78-0.85) | 0.82 (0.79-0.85) | 0.83 (0.80-0.86) | 0.82 (0.79-0.85) | 0.82 (0.79-0.85) | 0.83 (0.80-0.86) |
| 250 | 12  | 0.83 (0.81-0.84)             | 0.83 (0.81-0.85) | 0.84 (0.82-0.85) | 0.83 (0.81-0.85) | 0.83 (0.81-0.85) | 0.84 (0.82-0.86) |                  |
|     | 24  | 0.87 (0.85-0.88)             | 0.87 (0.85-0.88) | 0.89 (0.87-0.90) | 0.87 (0.85-0.88) | 0.87 (0.85-0.88) | 0.88 (0.87-0.90) |                  |
|     | 48  | 0.86 (0.84-0.88)             | 0.86 (0.84-0.88) | 0.88 (0.86-0.90) | 0.86 (0.84-0.88) | 0.86 (0.84-0.88) | 0.88 (0.86-0.90) |                  |
|     | 62  | 0.87 (0.85-0.88)             | 0.87 (0.85-0.88) | 0.88 (0.86-0.90) | 0.87 (0.85-0.88) | 0.87 (0.85-0.88) | 0.88 (0.86-0.89) |                  |

Supplementary Table 3: **AUC results from MVPA simulations for detection of simulated diagnosis across multiple sample sizes (n) and number of features (p) where the predictor has effects on covariance.** For each of 1000 simulations, the data is randomly split into 50% training and 50% validation then a random forests algorithm is trained using the training set to predict either Site 1 or the presence of the binary predictor. The median AUC across these simulations are reported with lower and upper quartiles displayed in parentheses.

| $n_i$ | $p$ | Site             |            |            | Diagnosis Status |            |            |
|-------|-----|------------------|------------|------------|------------------|------------|------------|
|       |     | Unharmonized (%) | ComBat (%) | CovBat (%) | Unharmonized (%) | ComBat (%) | CovBat (%) |
| 25    | 12  | 99               | 41         | 16         | 98               | 99         | 99         |
|       | 24  | 100              | 83         | 31         | 100              | 100        | 100        |
|       | 48  | 100              | 76         | 8          | 99               | 99         | 99         |
|       | 62  | 100              | 67         | 6          | 62               | 63         | 65         |
| 50    | 12  | 100              | 63         | 36         | 100              | 100        | 100        |
|       | 24  | 100              | 95         | 61         | 100              | 100        | 100        |
|       | 48  | 100              | 97         | 36         | 100              | 100        | 100        |
|       | 62  | 100              | 99         | 40         | 100              | 100        | 100        |
| 100   | 12  | 100              | 63         | 40         | 100              | 100        | 100        |
|       | 24  | 100              | 94         | 73         | 100              | 100        | 100        |
|       | 48  | 100              | 98         | 62         | 100              | 100        | 100        |
|       | 62  | 100              | 100        | 72         | 100              | 100        | 100        |
| 250   | 12  | 100              | 31         | 21         | 100              | 100        | 100        |
|       | 24  | 100              | 70         | 48         | 100              | 100        | 100        |
|       | 48  | 100              | 70         | 33         | 100              | 100        | 100        |
|       | 62  | 100              | 88         | 50         | 100              | 100        | 100        |

Supplementary Table 4: **MANOVA rejection rates for associations with site and diagnosis status across multiple sample sizes ( $n$ ) and number of features ( $p$ ) in the Diagnosis affects Mean simulations.** For each of 1000 simulations, MANOVA is performed separately for site and diagnosis using Pillai's trace. The rejection rate across these simulations is reported as the percentage of  $p$ -values less than 0.05.

| $n_i$ | $p$ | Site             |            |            | Diagnosis Status |            |            |
|-------|-----|------------------|------------|------------|------------------|------------|------------|
|       |     | Unharmonized (%) | ComBat (%) | CovBat (%) | Unharmonized (%) | ComBat (%) | CovBat (%) |
| 25    | 12  | 96               | 10         | 1          | 92               | 94         | 96         |
|       | 24  | 100              | 44         | 4          | 100              | 100        | 100        |
|       | 48  | 100              | 42         | 1          | 96               | 97         | 98         |
|       | 62  | 100              | 40         | 1          | 62               | 64         | 66         |
| 50    | 12  | 100              | 14         | 2          | 100              | 100        | 100        |
|       | 24  | 100              | 64         | 10         | 100              | 100        | 100        |
|       | 48  | 100              | 73         | 3          | 100              | 100        | 100        |
|       | 62  | 100              | 86         | 3          | 100              | 100        | 100        |
| 100   | 12  | 100              | 12         | 2          | 100              | 100        | 100        |
|       | 24  | 100              | 60         | 11         | 100              | 100        | 100        |
|       | 48  | 100              | 68         | 5          | 100              | 100        | 100        |
|       | 62  | 100              | 87         | 9          | 100              | 100        | 100        |
| 250   | 12  | 100              | 2          | 0          | 100              | 100        | 100        |
|       | 24  | 100              | 11         | 2          | 100              | 100        | 100        |
|       | 48  | 100              | 8          | 0          | 100              | 100        | 100        |
|       | 62  | 100              | 18         | 1          | 100              | 100        | 100        |

Supplementary Table 5: **MANOVA rejection rates for associations with site and diagnosis status across multiple sample sizes (n) and number of features (p) in the Diagnosis affects Covariance simulations.** For each of 1000 simulations, MANOVA is performed separately for site and diagnosis using Pillai's trace. The rejection rate across these simulations is reported as the percentage of  $p$ -values less than 0.05. Scenarios where the rejection rate is less than 0.05 are colored in blue.

| n   | p  | Site             |            |            | Diagnosis Status |            |            |
|-----|----|------------------|------------|------------|------------------|------------|------------|
|     |    | Unharmonized (%) | ComBat (%) | CovBat (%) | Unharmonized (%) | ComBat (%) | CovBat (%) |
| 25  | 12 | 94               | 1          | 0          | 74               | 78         | 82         |
|     | 24 | 100              | 25         | 0          | 97               | 98         | 98         |
|     | 36 | 100              | 48         | 1          | 99               | 99         | 99         |
|     | 48 | 100              | 50         | 0          | 100              | 100        | 100        |
|     | 62 | 100              | 47         | 1          | 96               | 97         | 98         |
| 50  | 12 | 100              | 1          | 0          | 99               | 99         | 99         |
|     | 24 | 100              | 53         | 3          | 100              | 100        | 100        |
|     | 36 | 100              | 83         | 6          | 100              | 100        | 100        |
|     | 48 | 100              | 92         | 9          | 100              | 100        | 100        |
|     | 62 | 100              | 99         | 16         | 100              | 100        | 100        |
| 100 | 12 | 100              | 2          | 0          | 100              | 100        | 100        |
|     | 24 | 100              | 52         | 7          | 100              | 100        | 100        |
|     | 36 | 100              | 86         | 18         | 100              | 100        | 100        |
|     | 48 | 100              | 95         | 27         | 100              | 100        | 100        |
|     | 62 | 100              | 100        | 61         | 100              | 100        | 100        |
| 250 | 12 | 100              | 0          | 0          | 100              | 100        | 100        |
|     | 24 | 100              | 9          | 1          | 100              | 100        | 100        |
|     | 36 | 100              | 29         | 6          | 100              | 100        | 100        |
|     | 48 | 100              | 48         | 8          | 100              | 100        | 100        |
|     | 62 | 100              | 83         | 29         | 100              | 100        | 100        |
| 500 | 12 | 100              | 0          | 0          | 100              | 100        | 100        |
|     | 24 | 100              | 0          | 0          | 100              | 100        | 100        |
|     | 36 | 100              | 0          | 0          | 100              | 100        | 100        |
|     | 48 | 100              | 0          | 0          | 100              | 100        | 100        |
|     | 62 | 100              | 4          | 0          | 100              | 100        | 100        |

Supplementary Table 6: **MANOVA rejection rates for associations with site and diagnosis status across multiple sample sizes (n) and number of features (p) in the Simple Covariance Effect simulations.** For each of 1000 simulations, MANOVA is performed separately for site and diagnosis using Pillai's trace. The rejection rate across these simulations is reported as the percentage of  $p$ -values less than 0.05. Scenarios where the rejection rate is less than 0.05 are colored in blue.
